# Supplementary material for: Optimized photodegradation of Bisphenol A in water using ZnO, TiO&lt;sub&gt;2&lt;/sub&gt; andSnO&lt;sub&gt;2&lt;/sub&gt; photocatalysts under UV radiation as a decontamination procedure
Source: Copernicus journal article supplement (doi:10.5194/dwes-9-27-2016), 2016-09-16
Supplement: Supplementary file 1 [file dwes-9-27-2016-supplement.pdf]

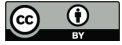

*Supplement of*

**Optimized photodegradation of Bisphenol A in water using ZnO, TiO<sub>2</sub> and SnO<sub>2</sub> photocatalysts under UV radiation as a decontamination procedure**

**Rudy Abo et al.**

*Correspondence to:* Rudy Abo (rudy.abo@hotmail.de)

The copyright of individual parts of the supplement might differ from the CC-BY 3.0 licence.

## UV-VIS absorbance spectrum of Bisphenol A

| Wave Length nm | Absorbance OD |
|----------------|---------------|
| 220.74         | 2.521         |
| 221.12         | 2.678         |
| 221.5          | 2.873         |
| 221.88         | 2.914         |
| 222.26         | 2.599         |
| 222.64         | 2.422         |
| 223.02         | 2.237         |
| 223.4          | 2.146         |
| 223.78         | 2.132         |
| 224.16         | 2.107         |
| 224.54         | 2.054         |
| 224.92         | 2.237         |
| 225.3          | 2.203         |
| 225.68         | 2.219         |
| 226.06         | 2.082         |
| 226.44         | 2.103         |
| 226.82         | 2.079         |
| 227.2          | 2.027         |
| 227.58         | 2.031         |
| 227.96         | 1.935         |
| 228.34         | 1.858         |
| 228.71         | 1.804         |
| 229.09         | 1.762         |
| 229.47         | 1.782         |
| 229.85         | 1.767         |
| 230.23         | 1.785         |
| 230.61         | 1.804         |
| 230.99         | 1.763         |
| 231.37         | 1.772         |
| 231.75         | 1.78          |
| 232.13         | 1.772         |
| 232.51         | 1.829         |
| 232.89         | 1.814         |
| 233.27         | 1.82          |
| 233.65         | 1.798         |
| 234.03         | 1.828         |
| 234.4          | 1.795         |
| 234.78         | 1.768         |
| 235.16         | 1.734         |
| 235.54         | 1.729         |

|        |       |
|--------|-------|
| 235.92 | 1.722 |
| 236.3  | 1.729 |
| 236.68 | 1.74  |
| 237.06 | 1.732 |
| 237.44 | 1.719 |
| 237.82 | 1.706 |
| 238.19 | 1.682 |
| 238.57 | 1.655 |
| 238.95 | 1.639 |
| 239.33 | 1.631 |
| 239.71 | 1.591 |
| 240.09 | 1.548 |
| 240.47 | 1.507 |
| 240.84 | 1.484 |
| 241.22 | 1.45  |
| 241.6  | 1.424 |
| 241.98 | 1.395 |
| 242.36 | 1.359 |
| 242.74 | 1.33  |
| 243.12 | 1.303 |
| 243.49 | 1.272 |
| 243.87 | 1.243 |
| 244.25 | 1.219 |
| 244.63 | 1.198 |
| 245.01 | 1.175 |
| 245.38 | 1.15  |
| 245.76 | 1.13  |
| 246.14 | 1.108 |
| 246.52 | 1.088 |
| 246.9  | 1.069 |
| 247.27 | 1.051 |
| 247.65 | 1.037 |
| 248.03 | 1.028 |
| 248.41 | 1.017 |
| 248.79 | 1.006 |
| 249.16 | 1.003 |
| 249.54 | 1.001 |
| 249.92 | 0.997 |
| 250.3  | 1.004 |
| 250.68 | 1.011 |
| 251.05 | 1.016 |
| 251.43 | 1.02  |
| 251.81 | 1.028 |

|        |       |
|--------|-------|
| 252.19 | 1.035 |
| 252.56 | 1.044 |
| 252.94 | 1.055 |
| 253.32 | 1.067 |
| 253.7  | 1.081 |
| 254.07 | 1.098 |
| 254.45 | 1.115 |
| 254.83 | 1.136 |
| 255.21 | 1.158 |
| 255.58 | 1.181 |
| 255.96 | 1.203 |
| 256.34 | 1.226 |
| 256.71 | 1.251 |
| 257.09 | 1.266 |
| 257.47 | 1.289 |
| 257.85 | 1.315 |
| 258.22 | 1.336 |
| 258.6  | 1.355 |
| 258.98 | 1.374 |
| 259.35 | 1.401 |
| 259.73 | 1.419 |
| 260.11 | 1.44  |
| 260.48 | 1.462 |
| 260.86 | 1.482 |
| 261.24 | 1.501 |
| 261.61 | 1.517 |
| 261.99 | 1.527 |
| 262.37 | 1.546 |
| 262.74 | 1.557 |
| 263.12 | 1.56  |
| 263.5  | 1.565 |
| 263.87 | 1.576 |
| 264.25 | 1.586 |
| 264.63 | 1.59  |
| 265    | 1.603 |
| 265.38 | 1.6   |
| 265.76 | 1.599 |
| 266.13 | 1.597 |
| 266.51 | 1.591 |
| 266.89 | 1.593 |
| 267.26 | 1.583 |
| 267.64 | 1.581 |
| 268.01 | 1.58  |

|        |       |
|--------|-------|
| 268.39 | 1.571 |
| 268.77 | 1.563 |
| 269.14 | 1.559 |
| 269.52 | 1.554 |
| 269.9  | 1.557 |
| 270.27 | 1.555 |
| 270.65 | 1.55  |
| 271.02 | 1.548 |
| 271.4  | 1.547 |
| 271.77 | 1.538 |
| 272.15 | 1.534 |
| 272.53 | 1.529 |
| 272.9  | 1.525 |
| 273.28 | 1.52  |
| 273.65 | 1.515 |
| 274.03 | 1.508 |
| 274.41 | 1.506 |
| 274.78 | 1.498 |
| 275.16 | 1.497 |
| 275.53 | 1.492 |
| 275.91 | 1.483 |
| 276.28 | 1.48  |
| 276.66 | 1.476 |
| 277.03 | 1.469 |
| 277.41 | 1.465 |
| 277.78 | 1.457 |
| 278.16 | 1.45  |
| 278.53 | 1.444 |
| 278.91 | 1.437 |
| 279.29 | 1.428 |
| 279.66 | 1.424 |
| 280.04 | 1.415 |
| 280.41 | 1.409 |
| 280.79 | 1.402 |
| 281.16 | 1.395 |
| 281.54 | 1.385 |
| 281.91 | 1.372 |
| 282.29 | 1.356 |
| 282.66 | 1.341 |
| 283.04 | 1.319 |
| 283.41 | 1.296 |
| 283.78 | 1.27  |
| 284.16 | 1.24  |

|        |       |
|--------|-------|
| 284.53 | 1.206 |
| 284.91 | 1.171 |
| 285.28 | 1.132 |
| 285.66 | 1.09  |
| 286.03 | 1.048 |
| 286.41 | 1.005 |
| 286.78 | 0.961 |
| 287.16 | 0.919 |
| 287.53 | 0.876 |
| 287.91 | 0.835 |
| 288.28 | 0.794 |
| 288.65 | 0.755 |
| 289.03 | 0.717 |
| 289.4  | 0.679 |
| 289.78 | 0.643 |
| 290.15 | 0.607 |
| 290.53 | 0.573 |
| 290.9  | 0.539 |
| 291.27 | 0.507 |
| 291.65 | 0.476 |
| 292.02 | 0.446 |
| 292.4  | 0.417 |
| 292.77 | 0.391 |
| 293.14 | 0.366 |
| 293.52 | 0.343 |
| 293.89 | 0.322 |
| 294.27 | 0.303 |
| 294.64 | 0.285 |
| 295.01 | 0.269 |
| 295.39 | 0.254 |
| 295.76 | 0.241 |
| 296.13 | 0.229 |
| 296.51 | 0.218 |
| 296.88 | 0.208 |
| 297.25 | 0.2   |
| 297.63 | 0.192 |
| 298    | 0.185 |
| 298.38 | 0.178 |
| 298.75 | 0.173 |
| 299.12 | 0.168 |
| 299.5  | 0.163 |
| 299.87 | 0.159 |
| 300.24 | 0.156 |

|        |       |
|--------|-------|
| 300.62 | 0.153 |
| 300.99 | 0.15  |
| 301.36 | 0.148 |
| 301.73 | 0.147 |
| 302.11 | 0.145 |
| 302.48 | 0.144 |
| 302.85 | 0.143 |
| 303.23 | 0.142 |
| 303.6  | 0.141 |
| 303.97 | 0.14  |
| 304.35 | 0.14  |
| 304.72 | 0.139 |
| 305.09 | 0.139 |
| 305.46 | 0.138 |
| 305.84 | 0.138 |
| 306.21 | 0.138 |
| 306.58 | 0.138 |
| 306.96 | 0.137 |
| 307.33 | 0.137 |
| 307.7  | 0.137 |
| 308.07 | 0.137 |
| 308.45 | 0.137 |
| 308.82 | 0.136 |
| 309.19 | 0.136 |
| 309.56 | 0.136 |
| 309.94 | 0.136 |
| 310.31 | 0.136 |
| 310.68 | 0.136 |
| 311.05 | 0.135 |
| 311.42 | 0.135 |
| 311.8  | 0.135 |
| 312.17 | 0.135 |
| 312.54 | 0.135 |
| 312.91 | 0.135 |
| 313.29 | 0.134 |
| 313.66 | 0.134 |
| 314.03 | 0.134 |
| 314.4  | 0.134 |
| 314.77 | 0.134 |
| 315.15 | 0.134 |
| 315.52 | 0.133 |
| 315.89 | 0.133 |
| 316.26 | 0.133 |

|        |       |
|--------|-------|
| 316.63 | 0.133 |
| 317    | 0.132 |
| 317.38 | 0.132 |
| 317.75 | 0.132 |
| 318.12 | 0.132 |
| 318.49 | 0.132 |
| 318.86 | 0.132 |
| 319.23 | 0.131 |
| 319.61 | 0.131 |
| 319.98 | 0.131 |
| 320.35 | 0.131 |
| 320.72 | 0.13  |
| 321.09 | 0.13  |
| 321.46 | 0.13  |
| 321.83 | 0.13  |
| 322.21 | 0.13  |
| 322.58 | 0.129 |
| 322.95 | 0.129 |
| 323.32 | 0.129 |
| 323.69 | 0.129 |
| 324.06 | 0.129 |
| 324.43 | 0.129 |
| 324.8  | 0.129 |
| 325.17 | 0.128 |
| 325.54 | 0.128 |
| 325.92 | 0.128 |
| 326.29 | 0.128 |
| 326.66 | 0.128 |
| 327.03 | 0.127 |
| 327.4  | 0.127 |
| 327.77 | 0.127 |
| 328.14 | 0.127 |
| 328.51 | 0.127 |
| 328.88 | 0.127 |
| 329.25 | 0.127 |
| 329.62 | 0.127 |
| 329.99 | 0.127 |
| 330.36 | 0.126 |
| 330.73 | 0.126 |
| 331.1  | 0.126 |
| 331.47 | 0.126 |
| 331.85 | 0.126 |
| 332.22 | 0.126 |



|        |       |
|--------|-------|
| 332.59 | 0.126 |
| 332.96 | 0.125 |
| 333.33 | 0.125 |
| 333.7  | 0.125 |
| 334.07 | 0.125 |
| 334.44 | 0.125 |
| 334.81 | 0.124 |
| 335.18 | 0.124 |
| 335.55 | 0.124 |
| 335.92 | 0.124 |
| 336.29 | 0.124 |
| 336.66 | 0.124 |
| 337.03 | 0.123 |
| 337.4  | 0.123 |
| 337.77 | 0.123 |
| 338.14 | 0.123 |
| 338.51 | 0.123 |
| 338.87 | 0.122 |
| 339.24 | 0.122 |
| 339.61 | 0.122 |
| 339.98 | 0.122 |
| 340.35 | 0.122 |
| 340.72 | 0.121 |
| 341.09 | 0.121 |
| 341.46 | 0.121 |
| 341.83 | 0.121 |
| 342.2  | 0.121 |
| 342.57 | 0.121 |
| 342.94 | 0.121 |
| 343.31 | 0.121 |
| 343.68 | 0.121 |
| 344.05 | 0.12  |
| 344.42 | 0.12  |
| 344.78 | 0.12  |
| 345.15 | 0.12  |
| 345.52 | 0.12  |
| 345.89 | 0.12  |
| 346.26 | 0.12  |
| 346.63 | 0.12  |
| 347    | 0.12  |
| 347.37 | 0.12  |
| 347.74 | 0.12  |
| 348.1  | 0.12  |

|        |       |
|--------|-------|
| 348.47 | 0.12  |
| 348.84 | 0.12  |
| 349.21 | 0.12  |
| 349.58 | 0.12  |
| 349.95 | 0.12  |
| 350.32 | 0.119 |
| 350.68 | 0.119 |
| 351.05 | 0.119 |
| 351.42 | 0.119 |
| 351.79 | 0.119 |
| 352.16 | 0.119 |
| 352.53 | 0.119 |
| 352.89 | 0.118 |
| 353.26 | 0.118 |
| 353.63 | 0.118 |
| 354    | 0.118 |
| 354.37 | 0.118 |
| 354.74 | 0.118 |
| 355.1  | 0.118 |
| 355.47 | 0.118 |
| 355.84 | 0.118 |
| 356.21 | 0.118 |
| 356.58 | 0.118 |
| 356.94 | 0.118 |
| 357.31 | 0.117 |
| 357.68 | 0.117 |
| 358.05 | 0.117 |
| 358.41 | 0.117 |
| 358.78 | 0.117 |
| 359.15 | 0.117 |
| 359.52 | 0.117 |
| 359.89 | 0.117 |
| 360.25 | 0.117 |
| 360.62 | 0.117 |
| 360.99 | 0.117 |
| 361.36 | 0.117 |
| 361.72 | 0.117 |
| 362.09 | 0.117 |
| 362.46 | 0.117 |
| 362.82 | 0.117 |
| 363.19 | 0.117 |
| 363.56 | 0.116 |
| 363.93 | 0.116 |

|        |       |
|--------|-------|
| 364.29 | 0.116 |
| 364.66 | 0.116 |
| 365.03 | 0.116 |
| 365.39 | 0.116 |
| 365.76 | 0.116 |
| 366.13 | 0.116 |
| 366.5  | 0.116 |
| 366.86 | 0.116 |
| 367.23 | 0.115 |
| 367.6  | 0.115 |
| 367.96 | 0.115 |
| 368.33 | 0.115 |
| 368.7  | 0.115 |
| 369.06 | 0.115 |
| 369.43 | 0.115 |
| 369.8  | 0.115 |
| 370.16 | 0.114 |
| 370.53 | 0.114 |
| 370.9  | 0.114 |
| 371.26 | 0.114 |
| 371.63 | 0.114 |
| 372    | 0.114 |
| 372.36 | 0.114 |
| 372.73 | 0.114 |
| 373.09 | 0.114 |
| 373.46 | 0.114 |
| 373.83 | 0.114 |
| 374.19 | 0.114 |
| 374.56 | 0.114 |
| 374.93 | 0.114 |
| 375.29 | 0.113 |
| 375.66 | 0.113 |
| 376.02 | 0.113 |
| 376.39 | 0.113 |
| 376.76 | 0.113 |
| 377.12 | 0.113 |
| 377.49 | 0.113 |
| 377.85 | 0.113 |
| 378.22 | 0.113 |
| 378.58 | 0.112 |
| 378.95 | 0.112 |
| 379.32 | 0.112 |
| 379.68 | 0.112 |

|        |       |
|--------|-------|
| 380.05 | 0.112 |
| 380.41 | 0.112 |
| 380.78 | 0.112 |
| 381.14 | 0.112 |
| 381.51 | 0.112 |
| 381.87 | 0.112 |
| 382.24 | 0.112 |
| 382.6  | 0.112 |
| 382.97 | 0.112 |
| 383.34 | 0.112 |
| 383.7  | 0.112 |
| 384.07 | 0.112 |
| 384.43 | 0.112 |
| 384.8  | 0.111 |
| 385.16 | 0.111 |
| 385.53 | 0.111 |
| 385.89 | 0.111 |
| 386.26 | 0.111 |
| 386.62 | 0.111 |
| 386.99 | 0.111 |
| 387.35 | 0.111 |
| 387.71 | 0.111 |
| 388.08 | 0.111 |
| 388.44 | 0.111 |
| 388.81 | 0.111 |
| 389.17 | 0.111 |
| 389.54 | 0.11  |
| 389.9  | 0.111 |
| 390.27 | 0.111 |
| 390.63 | 0.11  |
| 391    | 0.11  |
| 391.36 | 0.11  |
| 391.73 | 0.11  |
| 392.09 | 0.11  |
| 392.45 | 0.11  |
| 392.82 | 0.11  |
| 393.18 | 0.11  |
| 393.55 | 0.11  |
| 393.91 | 0.11  |
| 394.27 | 0.11  |
| 394.64 | 0.11  |
| 395    | 0.11  |
| 395.37 | 0.11  |

|        |      |
|--------|------|
| 395.73 | 0.11 |
| 396.09 | 0.11 |
| 396.46 | 0.11 |
| 396.82 | 0.11 |
| 397.19 | 0.11 |
| 397.55 | 0.11 |
| 397.91 | 0.11 |
| 398.28 | 0.11 |
| 398.64 | 0.11 |
| 399    | 0.11 |
| 399.37 | 0.11 |
| 399.73 | 0.11 |
| 400.1  | 0.11 |

**Photodegradation of BPA in pure water under low-intensity UV**

| Initial Conc.           | 25 ppm BPA               |                          |                         |
|-------------------------|--------------------------|--------------------------|-------------------------|
| Date                    | 23.04.12                 |                          |                         |
| Only UV                 | 245-366 nm               |                          |                         |
| Irradiation Time<br>min | Bisphenol A<br>Peak Area | Bisphenol A Conc.<br>ppm | Degradation Rate<br>(%) |
| 0                       | 45414                    | 25                       | 0                       |
| 60                      | 43398                    | 24.30                    | 04.44                   |
| 120                     | 42869                    | 24.00                    | 05.60                   |
| 180                     | 40117                    | 22.53                    | 11.66                   |
| 240                     | 37507                    | 21.13                    | 17.41                   |
| 300                     | 33560                    | 18.98                    | 26.10                   |
| 360                     | 31055                    | 17.61                    | 31.62                   |
| 420                     | 27118                    | 15.43                    | 40.28                   |
| 480                     | 24159                    | 13.78                    | 46.80                   |
| 540                     | 20844                    | 11.91                    | 54.10                   |
| 600                     | 18069                    | 10.33                    | 60.21                   |
| 660                     | 15810                    | 09.03                    | 65.18                   |
| 720                     | 14114                    | 08.06                    | 68.92                   |
| 780                     | 11518                    | 6.55                     | 74.63                   |
| 840                     | 10844                    | 06.16                    | 76.12                   |
| 900                     | 9842                     | 05.57                    | 78.33                   |

### Influence of BPA initial concentration

| Time of Irradiation min | BPA_50 ppm | BPA_25 ppm |
|-------------------------|------------|------------|
| 0                       | 0.3        | 0.0        |
| 60                      | 0.6        | 3.6        |
| 120                     | 2.2        | 7.8        |
| 180                     | 5.3        | 13.7       |
| 240                     | 8.6        | 19.3       |
| 300                     | 12.1       | 27.8       |
| 360                     | 15.2       | 34.2       |
| 420                     | 19.4       | 41.7       |
| 480                     | 25.0       | 48.0       |
| 540                     | 30.9       | 55.2       |
| 600                     | 40.4       | 61.1       |
| 660                     | 47.2       | 66.0       |
| 720                     | 52.6       | 69.6       |
| 780                     | 60.3       | 74.2       |
| 840                     | 65.6       | 76.7       |
| 900                     | 69.8       | 78.8       |

### Comparison of the relative degradation percentage of BPA with and without catalysts

| Irradiation time (min) | ZnO   | TiO <sub>2</sub> | SnO <sub>2</sub> | without catalyst |
|------------------------|-------|------------------|------------------|------------------|
| 0                      | -     | -                | -                | -                |
| 60                     | 61.00 | 18.50            | 15.10            | 03.63            |
| 120                    | 80.00 | 35.20            | 26.70            | 07.76            |
| 180                    | 89.10 | 45.50            | 36.90            | 13.68            |
| 240                    | 95.50 | 54.10            | 41.20            | 19.30            |
| 300                    | 99.00 | 65.30            | 48.10            | 27.79            |

### The effect of catalyst concentration at 3h of degradation

| Catalyst concentration (w/w)% | Time (min) | Degradation rate% ZnO suspension | Degradation rate% TiO <sub>2</sub> suspension | Degradation rate% SnO <sub>2</sub> suspension |
|-------------------------------|------------|----------------------------------|-----------------------------------------------|-----------------------------------------------|
| 0.1                           | 270        | 89                               | 46                                            | 37                                            |
| 0.2                           | 270        | 95                               | 63                                            | 57                                            |

### The effect of NaOCl doses on the degradation efficiency

| Irradiation Time (min) | D_Rate% at 0.1Mm NaOCl | D_Rate% at 0.3Mm NaOCl | D_Rate% at 0.5Mm NaOCl |
|------------------------|------------------------|------------------------|------------------------|
| 0                      | 0                      | 0                      | 0                      |
| 15                     | 68.69                  | 83.50                  | 97.54                  |
| 30                     | 74.17                  | 85.29                  | 97.98                  |
| 45                     | 77.33                  | 90.49                  | 98.26                  |
| 60                     | 77.63                  | 91.41                  | 98.87                  |

### The concentration decrease of BPA using advanced photocatalytic oxidation

| Irradiation Time (min) | BPA ppm (ZnO suspension) | BPA ppm (TiO2 suspension) | BPA ppm (SnO2 suspension) |
|------------------------|--------------------------|---------------------------|---------------------------|
| 0                      | 25.00                    | 25.00                     | 25.00                     |
| 15                     | 04.20                    | 04.50                     | 04.20                     |
| 30                     | 03.10                    | 04.00                     | 03.80                     |
| 45                     | 02.30                    | 03.40                     | 03.20                     |
| 60                     | 01.20                    | 03.10                     | 02.90                     |
